# Supplementary material
Source: publisher figshare collection journal article supplement (https://plos.figshare.com/articles/dataset/_/120570)
Supplement: Supplementary file [file 1]

**APPENDIX S1: COMPARATIVE ANALYSES OF KEY FINDINGS**  
**(Beskow LM, et al. IRBs' use and understanding of Certificates of Confidentiality)**

**Q40-Willingness to be contacted about a follow-up interview**

| Measure                                                                                                                                                                  | Statistic/<br>Category | Q40                                                              |                                                                      | p Value#            |
|--------------------------------------------------------------------------------------------------------------------------------------------------------------------------|------------------------|------------------------------------------------------------------|----------------------------------------------------------------------|---------------------|
|                                                                                                                                                                          |                        | IS willing to be<br>contacted about an<br>interview<br>(n = 103) | is NOT willing to<br>be contacted about<br>an interview<br>(n = 143) |                     |
| 1. For how many years have you been an IRB chair?                                                                                                                        | n                      | 103                                                              | 143                                                                  | 0.08 <sup>^</sup>   |
|                                                                                                                                                                          | 5+                     | 62 ( 60%)                                                        | 70 ( 49%)                                                            |                     |
|                                                                                                                                                                          | <5                     | 41 ( 40%)                                                        | 73 ( 51%)                                                            |                     |
| 31-37. Number of correct answers in q31 q32 q34 q35 q36 q37                                                                                                              | n                      | 93                                                               | 142                                                                  | 0.02 <sup>^</sup>   |
|                                                                                                                                                                          | 1) <3                  | 33 ( 35%)                                                        | 73 ( 51%)                                                            |                     |
|                                                                                                                                                                          | 2) 3+                  | 60 ( 65%)                                                        | 69 ( 49%)                                                            |                     |
| 3. How familiar are you with Certificates of Confidentiality? (Recoded)                                                                                                  | n                      | 103                                                              | 143                                                                  | 0.0004 <sup>^</sup> |
|                                                                                                                                                                          | 1=More familiar        | 60 ( 58%)                                                        | 51 ( 36%)                                                            |                     |
|                                                                                                                                                                          | 2=Less familiar        | 43 ( 42%)                                                        | 92 ( 64%)                                                            |                     |
| 20-24. Composite opinion score = q20+q22+q23+(6-q21)+(6-q24)                                                                                                             | N                      | 95                                                               | 135                                                                  | 0.64 <sup>^^^</sup> |
|                                                                                                                                                                          | 1) <15                 | 25 ( 26%)                                                        | 37 ( 27%)                                                            |                     |
|                                                                                                                                                                          | 2) 15-17               | 42 ( 44%)                                                        | 63 ( 47%)                                                            |                     |
|                                                                                                                                                                          | 3) 18+                 | 28 ( 29%)                                                        | 35 ( 26%)                                                            |                     |
| 30. Have any studies at your institution ever received a legal demand (e.g., a subpoena, a court order, or other formal request) to disclose identifiable research data? | N                      | 64                                                               | 88                                                                   | 0.12 <sup>^</sup>   |
|                                                                                                                                                                          | No                     | 50 ( 78%)                                                        | 77 ( 88%)                                                            |                     |
|                                                                                                                                                                          | Yes                    | 14 ( 22%)                                                        | 11 ( 13%)                                                            |                     |

### Q3-Familiarity with Certificates

| Measure                                                                                                                                                                  | Statistic/<br>Category | Q3                           |                              | p Value# |
|--------------------------------------------------------------------------------------------------------------------------------------------------------------------------|------------------------|------------------------------|------------------------------|----------|
|                                                                                                                                                                          |                        | 1=More familiar<br>(n = 111) | 2=Less familiar<br>(n = 135) |          |
| 1. For how many years have you been an IRB chair?                                                                                                                        | n                      | 111                          | 135                          | 0.007^   |
|                                                                                                                                                                          | 5+                     | 70 ( 63%)                    | 62 ( 46%)                    |          |
|                                                                                                                                                                          | <5                     | 41 ( 37%)                    | 73 ( 54%)                    |          |
| 31-37. Number of correct answers in q31 q32 q34 q35 q36 q37                                                                                                              | n                      | 109                          | 126                          | <0.0001^ |
|                                                                                                                                                                          | 1) <3                  | 24 ( 22%)                    | 82 ( 65%)                    |          |
|                                                                                                                                                                          | 2) 3+                  | 85 ( 78%)                    | 44 ( 35%)                    |          |
| 20-24. Composite opinion score = q20+q22+q23+(6-q21)+(6-q24)                                                                                                             | n                      | 106                          | 124                          | 0.53^^^  |
|                                                                                                                                                                          | 1) <15                 | 34 ( 32%)                    | 28 ( 23%)                    |          |
|                                                                                                                                                                          | 2) 15-17               | 34 ( 32%)                    | 71 ( 57%)                    |          |
|                                                                                                                                                                          | 3) 18+                 | 38 ( 36%)                    | 25 ( 20%)                    |          |
| 30. Have any studies at your institution ever received a legal demand (e.g., a subpoena, a court order, or other formal request) to disclose identifiable research data? | n                      | 75                           | 77                           | 0.01^    |
|                                                                                                                                                                          | No                     | 57 ( 76%)                    | 70 ( 91%)                    |          |
|                                                                                                                                                                          | Yes                    | 18 ( 24%)                    | 7 ( 9%)                      |          |

## Knowledge Score

| Measure                                                                                                                                                                  | Statistic/<br>Category | Number of correct answers in<br>q31 q32 q34 q35 q36 q37 |                    | p Value# |
|--------------------------------------------------------------------------------------------------------------------------------------------------------------------------|------------------------|---------------------------------------------------------|--------------------|----------|
|                                                                                                                                                                          |                        | 1) <3<br>(n = 106)                                      | 2) 3+<br>(n = 129) |          |
| 1. For how many years have you been an IRB chair?                                                                                                                        | n                      | 106                                                     | 129                | 0.02^    |
|                                                                                                                                                                          | 5+                     | 48 ( 45%)                                               | 78 ( 60%)          |          |
|                                                                                                                                                                          | <5                     | 58 ( 55%)                                               | 51 ( 40%)          |          |
| 3. How familiar are you with Certificates of Confidentiality? (Recoded)                                                                                                  | n                      | 106                                                     | 129                | <0.0001^ |
|                                                                                                                                                                          | 1=More familiar        | 24 ( 23%)                                               | 85 ( 66%)          |          |
|                                                                                                                                                                          | 2=Less familiar        | 82 ( 77%)                                               | 44 ( 34%)          |          |
| 20-24. Composite opinion score = q20+q22+q23+(6-q21)+(6-q24)                                                                                                             | n                      | 100                                                     | 124                | 0.09^^^  |
|                                                                                                                                                                          | 1) <15                 | 31 ( 31%)                                               | 30 ( 24%)          |          |
|                                                                                                                                                                          | 2) 15-17               | 47 ( 47%)                                               | 54 ( 44%)          |          |
|                                                                                                                                                                          | 3) 18+                 | 22 ( 22%)                                               | 40 ( 32%)          |          |
| 30. Have any studies at your institution ever received a legal demand (e.g., a subpoena, a court order, or other formal request) to disclose identifiable research data? | n                      | 67                                                      | 83                 | 0.61^    |
|                                                                                                                                                                          | No                     | 57 ( 85%)                                               | 68 ( 82%)          |          |
|                                                                                                                                                                          | Yes                    | 10 ( 15%)                                               | 15 ( 18%)          |          |

## Composite Opinion Score

| Measure                                                                                                                                                                  | Statistic/<br>Category | Composite Opinion Score =<br>q20+q22+q23+(6-q21)+(6-q24) |                       |                    | p Value#            |
|--------------------------------------------------------------------------------------------------------------------------------------------------------------------------|------------------------|----------------------------------------------------------|-----------------------|--------------------|---------------------|
|                                                                                                                                                                          |                        | 1) <15<br>(n = 62)                                       | 2) 15-17<br>(n = 105) | 3) 18+<br>(n = 63) |                     |
| 1. For how many years have you been an IRB chair?                                                                                                                        | n                      | 62                                                       | 105                   | 63                 | 0.41 <sup>^^^</sup> |
|                                                                                                                                                                          | 5+                     | 38 ( 61%)                                                | 55 ( 52%)             | 34 ( 54%)          |                     |
|                                                                                                                                                                          | <5                     | 24 ( 39%)                                                | 50 ( 48%)             | 29 ( 46%)          |                     |
| 31-37. Number of correct answers in q31 q32 q34 q35 q36 q37                                                                                                              | n                      | 61                                                       | 101                   | 62                 | 0.09 <sup>^^^</sup> |
|                                                                                                                                                                          | 1) <3                  | 31 ( 51%)                                                | 47 ( 47%)             | 22 ( 35%)          |                     |
|                                                                                                                                                                          | 2) 3+                  | 30 ( 49%)                                                | 54 ( 53%)             | 40 ( 65%)          |                     |
| 3. How familiar are you with Certificates of Confidentiality? (Recoded)                                                                                                  | n                      | 62                                                       | 105                   | 63                 | 0.53 <sup>^^^</sup> |
|                                                                                                                                                                          | 1=More familiar        | 34 ( 55%)                                                | 34 ( 32%)             | 38 ( 60%)          |                     |
|                                                                                                                                                                          | 2=Less familiar        | 28 ( 45%)                                                | 71 ( 68%)             | 25 ( 40%)          |                     |
| 30. Have any studies at your institution ever received a legal demand (e.g., a subpoena, a court order, or other formal request) to disclose identifiable research data? | n                      | 41                                                       | 60                    | 44                 | 0.06 <sup>^^^</sup> |
|                                                                                                                                                                          | No                     | 36 ( 88%)                                                | 52 ( 87%)             | 32 ( 73%)          |                     |
|                                                                                                                                                                          | Yes                    | 5 ( 12%)                                                 | 8 ( 13%)              | 12 ( 27%)          |                     |

**Q26 [AMONG Q25 = Greater than minimal risk (n=190)] -Would your IRB approve this research without a Certificate of Confidentiality?**

| Measure                                                                                                                                                                  | Statistic/<br>Category | 26. Would your IRB approve this<br>research without a Certificate? |                 | p Value# |
|--------------------------------------------------------------------------------------------------------------------------------------------------------------------------|------------------------|--------------------------------------------------------------------|-----------------|----------|
|                                                                                                                                                                          |                        | No<br>(n = 88)                                                     | Yes<br>(n = 84) |          |
| 1. For how many years have you been an IRB chair?                                                                                                                        | n                      | 88                                                                 | 84              | 0.23^    |
|                                                                                                                                                                          | 5+                     | 53 ( 60%)                                                          | 43 ( 51%)       |          |
|                                                                                                                                                                          | <5                     | 35 ( 40%)                                                          | 41 ( 49%)       |          |
| 31-37. Number of correct answers in q31 q32 q34 q35 q36 q37                                                                                                              | n                      | 88                                                                 | 84              | 0.010^   |
|                                                                                                                                                                          | 1) <3                  | 27 ( 31%)                                                          | 42 ( 50%)       |          |
|                                                                                                                                                                          | 2) 3+                  | 61 ( 69%)                                                          | 42 ( 50%)       |          |
| 3. How familiar are you with Certificates of Confidentiality? (Recorded)                                                                                                 | n                      | 88                                                                 | 84              | 0.03^    |
|                                                                                                                                                                          | 1=More familiar        | 49 ( 56%)                                                          | 33 ( 39%)       |          |
|                                                                                                                                                                          | 2=Less familiar        | 39 ( 44%)                                                          | 51 ( 61%)       |          |
| 20-24. Composite opinion score = q20+q22+q23+(6-q21)+(6-q24)                                                                                                             | n                      | 84                                                                 | 82              | 0.92^^^  |
|                                                                                                                                                                          | 1) <15                 | 23 ( 27%)                                                          | 21 ( 26%)       |          |
|                                                                                                                                                                          | 2) 15-17               | 35 ( 42%)                                                          | 38 ( 46%)       |          |
|                                                                                                                                                                          | 3) 18+                 | 26 ( 31%)                                                          | 23 ( 28%)       |          |
| 30. Have any studies at your institution ever received a legal demand (e.g., a subpoena, a court order, or other formal request) to disclose identifiable research data? | n                      | 57                                                                 | 47              | 0.42^    |
|                                                                                                                                                                          | No                     | 45 ( 79%)                                                          | 40 ( 85%)       |          |
|                                                                                                                                                                          | Yes                    | 12 ( 21%)                                                          | 7 ( 15%)        |          |

**27. [AMONG Q25 = Greater than minimal risk (n=190)] If the Principal Investigator does obtain a Certificate how would you categorize the level of risk involved in this study?**

| Measure                                                                                                                                                                  | Statistic/<br>Category | 27. If the PI does obtain a Certificate<br>how would you categorize the level of<br>risk involved in this study? |                                             | p Value#            |
|--------------------------------------------------------------------------------------------------------------------------------------------------------------------------|------------------------|------------------------------------------------------------------------------------------------------------------|---------------------------------------------|---------------------|
|                                                                                                                                                                          |                        | Greater than<br>minimal risk<br>(n = 135)                                                                        | No greater than<br>minimal risk<br>(n = 50) |                     |
| 1. For how many years have you been an IRB chair?                                                                                                                        | n                      | 135                                                                                                              | 50                                          | 0.78 <sup>^</sup>   |
|                                                                                                                                                                          | 5+                     | 76 ( 56%)                                                                                                        | 27 ( 54%)                                   |                     |
|                                                                                                                                                                          | <5                     | 59 ( 44%)                                                                                                        | 23 ( 46%)                                   |                     |
| 31-37. Number of correct answers in q31 q32 q34 q35 q36 q37                                                                                                              | n                      | 135                                                                                                              | 50                                          | 0.98 <sup>^</sup>   |
|                                                                                                                                                                          | 1) <3                  | 57 ( 42%)                                                                                                        | 21 ( 42%)                                   |                     |
|                                                                                                                                                                          | 2) 3+                  | 78 ( 58%)                                                                                                        | 29 ( 58%)                                   |                     |
| 3. How familiar are you with Certificates of Confidentiality? (Recoded)                                                                                                  | n                      | 135                                                                                                              | 50                                          | 0.18 <sup>^</sup>   |
|                                                                                                                                                                          | 1=More familiar        | 58 ( 43%)                                                                                                        | 27 ( 54%)                                   |                     |
|                                                                                                                                                                          | 2=Less familiar        | 77 ( 57%)                                                                                                        | 23 ( 46%)                                   |                     |
| 20-24. Composite opinion score = q20+q22+q23+(6-q21)+(6-q24)                                                                                                             | n                      | 133                                                                                                              | 46                                          | 0.02 <sup>^^^</sup> |
|                                                                                                                                                                          | 1) <15                 | 41 ( 31%)                                                                                                        | 6 ( 13%)                                    |                     |
|                                                                                                                                                                          | 2) 15-17               | 56 ( 42%)                                                                                                        | 22 ( 48%)                                   |                     |
|                                                                                                                                                                          | 3) 18+                 | 36 ( 27%)                                                                                                        | 18 ( 39%)                                   |                     |
| 30. Have any studies at your institution ever received a legal demand (e.g., a subpoena, a court order, or other formal request) to disclose identifiable research data? | n                      | 85                                                                                                               | 28                                          | 0.86 <sup>^</sup>   |
|                                                                                                                                                                          | No                     | 71 ( 84%)                                                                                                        | 23 ( 82%)                                   |                     |
|                                                                                                                                                                          | Yes                    | 14 ( 16%)                                                                                                        | 5 ( 18%)                                    |                     |

**28. [AMONG Q25 = Greater than minimal risk (n=190)] If the Principal Investigator obtains a Certificate how would you characterize the change in protection provided to research participants in this study?**

| Measure                                                                                                                                                                  | Statistic/<br>Category | 28. If the PI obtains a Certificate how would you characterize the change in protection provided to participants in this study? |                                         |                                                         | p Value# |
|--------------------------------------------------------------------------------------------------------------------------------------------------------------------------|------------------------|---------------------------------------------------------------------------------------------------------------------------------|-----------------------------------------|---------------------------------------------------------|----------|
|                                                                                                                                                                          |                        | 1) Decreases protection (greatly or slightly) (n = 14)                                                                          | 2) No difference in protection (n = 12) | 3) Increases protection (greatly or slightly) (n = 164) |          |
| 1. For how many years have you been an IRB chair?                                                                                                                        | n                      | 14                                                                                                                              | 12                                      | 164                                                     | 0.77^^^  |
|                                                                                                                                                                          | 5+                     | 8 ( 57%)                                                                                                                        | 5 ( 42%)                                | 92 ( 56%)                                               |          |
|                                                                                                                                                                          | <5                     | 6 ( 43%)                                                                                                                        | 7 ( 58%)                                | 72 ( 44%)                                               |          |
| 31-37. Number of correct answers in q31 q32 q34 q35 q36 q37                                                                                                              | n                      | 14                                                                                                                              | 12                                      | 164                                                     | 0.39^^^  |
|                                                                                                                                                                          | 1) <3                  | 4 ( 29%)                                                                                                                        | 6 ( 50%)                                | 72 ( 44%)                                               |          |
|                                                                                                                                                                          | 2) 3+                  | 10 ( 71%)                                                                                                                       | 6 ( 50%)                                | 92 ( 56%)                                               |          |
| 3. How familiar are you with Certificates of Confidentiality? (Recoded)                                                                                                  | n                      | 14                                                                                                                              | 12                                      | 164                                                     | 0.42^^^  |
|                                                                                                                                                                          | 1=More familiar        | 8 ( 57%)                                                                                                                        | 5 ( 42%)                                | 72 ( 44%)                                               |          |
|                                                                                                                                                                          | 2=Less familiar        | 6 ( 43%)                                                                                                                        | 7 ( 58%)                                | 92 ( 56%)                                               |          |
| 20-24. Composite opinion score = q20+q22+q23+(6-q21)+(6-q24)                                                                                                             | n                      | 13                                                                                                                              | 12                                      | 158                                                     | 0.35^^   |
|                                                                                                                                                                          | 1) <15                 | 3 ( 23%)                                                                                                                        | 8 ( 67%)                                | 37 ( 23%)                                               |          |
|                                                                                                                                                                          | 2) 15-17               | 6 ( 46%)                                                                                                                        | 2 ( 17%)                                | 73 ( 46%)                                               |          |
|                                                                                                                                                                          | 3) 18+                 | 4 ( 31%)                                                                                                                        | 2 ( 17%)                                | 48 ( 30%)                                               |          |
| 30. Have any studies at your institution ever received a legal demand (e.g., a subpoena, a court order, or other formal request) to disclose identifiable research data? | n                      | 12                                                                                                                              | 7                                       | 97                                                      | 0.89^^^  |
|                                                                                                                                                                          | No                     | 10 ( 83%)                                                                                                                       | 6 ( 86%)                                | 80 ( 82%)                                               |          |
|                                                                                                                                                                          | Yes                    | 2 ( 17%)                                                                                                                        | 1 ( 14%)                                | 17 ( 18%)                                               |          |

- ^ Pearson's chi-square test
- ^^ Cochran-Mantel-Haenszel test on nonzero correlation
- ^^^ Cochran-Mantel-Haenszel test on row mean scores difference
- # Wilcoxon rank sum/Kruskal-Wallis test was used for all continuous row variables

Source: /ccge/Projects/CofC/program/FinalRun.sas; Date: 28MAR12
